# Supplementary material for: Evaluating the consistency of rice and paddy quality using four-dimensional fingerprint analysis
Source: Royal Society of Chemistry journal article supplement (doi:10.1039/d3nj05593k), 2024-01-01
Supplement: d3nj05593k1.pdf [file d3nj05593k1.pdf]

## Evaluating the consistency of rice and paddy quality using four-dimensional fingerprint analysis

Yu Ren <sup>a</sup>, Gang Li <sup>b\*</sup>, Ting Yang <sup>a\*</sup>, Guoxiang Sun <sup>a\*</sup>

<sup>a</sup> School of Pharmacy, Shenyang Pharmaceutical University, Shenyang, Liaoning 110016, China

<sup>b</sup> School of Life Science and Biopharmaceutics, Shenyang Pharmaceutical University, Shenyang, Liaoning 110016, China

### E-mail address

Gang Li: [kpslg@126.com](mailto:kpslg@126.com)

Ting Yang: [17863523526@139.com](mailto:17863523526@139.com)

Guoxiang Sun: [gxswmwys@163.com](mailto:gxswmwys@163.com)

**Table S1** The quality classification of sample by SQFM

| Grade   | 1           | 2           | 3           | 4           | 5           | 6           | 7           | 8        |
|---------|-------------|-------------|-------------|-------------|-------------|-------------|-------------|----------|
| $S_m$   | $\geq 0.95$ | $\geq 0.90$ | $\geq 0.85$ | $\geq 0.80$ | $\geq 0.70$ | $\geq 0.60$ | $\geq 0.50$ | $< 0.50$ |
| $P_m\%$ | 95-105      | 90-110      | 85-115      | 80-120      | 70-130      | 60-140      | 50-150      | $< 0.5$  |

**Table S2** Source information of rice and paddy samples

| No. | Location              | No. | Location          |
|-----|-----------------------|-----|-------------------|
| S1  | Hunan Province        | S16 | Hubei Province    |
| S2  | Heilongjiang Province | S17 | Jiangxi Province  |
| S3  | Jiangsu Province      | S18 | Jiangsu Province  |
| S4  | Jiangsu Province      | S19 | Anhui Province    |
| S5  | Heilongjiang Province | S20 | Hunan Province    |
| S6  | Liaoning Province     | S21 | Hainan Province   |
| S7  | Liaoning Province     | S22 | Jilin Province    |
| S8  | Liaoning Province     | S23 | Yunnan Province   |
| S9  | Liaoning Province     | S24 | Sichuan Province  |
| S10 | Heilongjiang Province | S25 | Tianjin City      |
| S11 | Heilongjiang Province | S26 | Chongqing City    |
| S12 | Heilongjiang Province | S27 | Shandong Province |
| S13 | Heilongjiang Province | S28 | Henan Province    |
| S14 | Liaoning Province     | S29 | Fujian Province   |
| S15 | Heilongjiang Province | S30 | Guangxi Province  |
